# Supplementary material for: A Tailored Strategy to Crosslink the Aspartate Transcarbamoylase Domain of the Multienzymatic Protein CAD
Source: MDPI journal article supplement (doi:10.3390/molecules28020660), 2023-01-09
Supplement: s1 [file s1]

**Supplementary Materials:** The following supporting information can be downloaded at: [www.mdpi.com/xxx/](http://www.mdpi.com/xxx/) and supplementary materials contain: Figure S1, Figure S2 and Table S1.

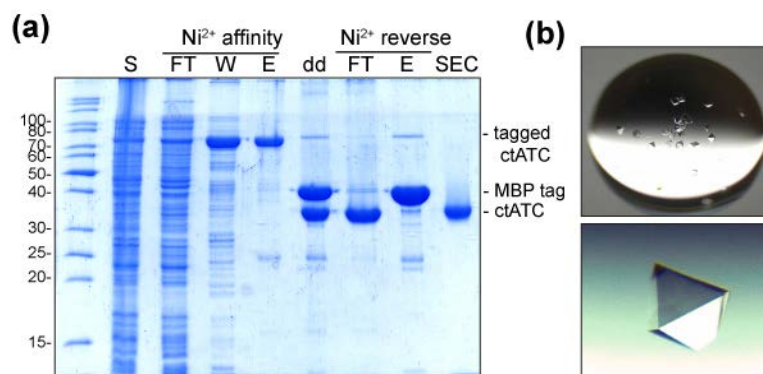

**Figure S1. ctATC2Cys purification and crystallization.** (a) SDS-PAGE of different steps along the purification of ctATC2Cys: S, soluble fraction of the lysate; Ni<sup>2+</sup> affinity FT, W, and E, are the flowthrough, wash with 35 mM imidazole and elution of the first affinity column; dd, sample after dialysis and digestion with PreScission; Ni<sup>2+</sup> reverse FT and E are the flowthrough and elution of the second affinity column; SEC, sample after size exclusion chromatography. (b) Bipyramidal-shaped crystals of ctATC2Cys.

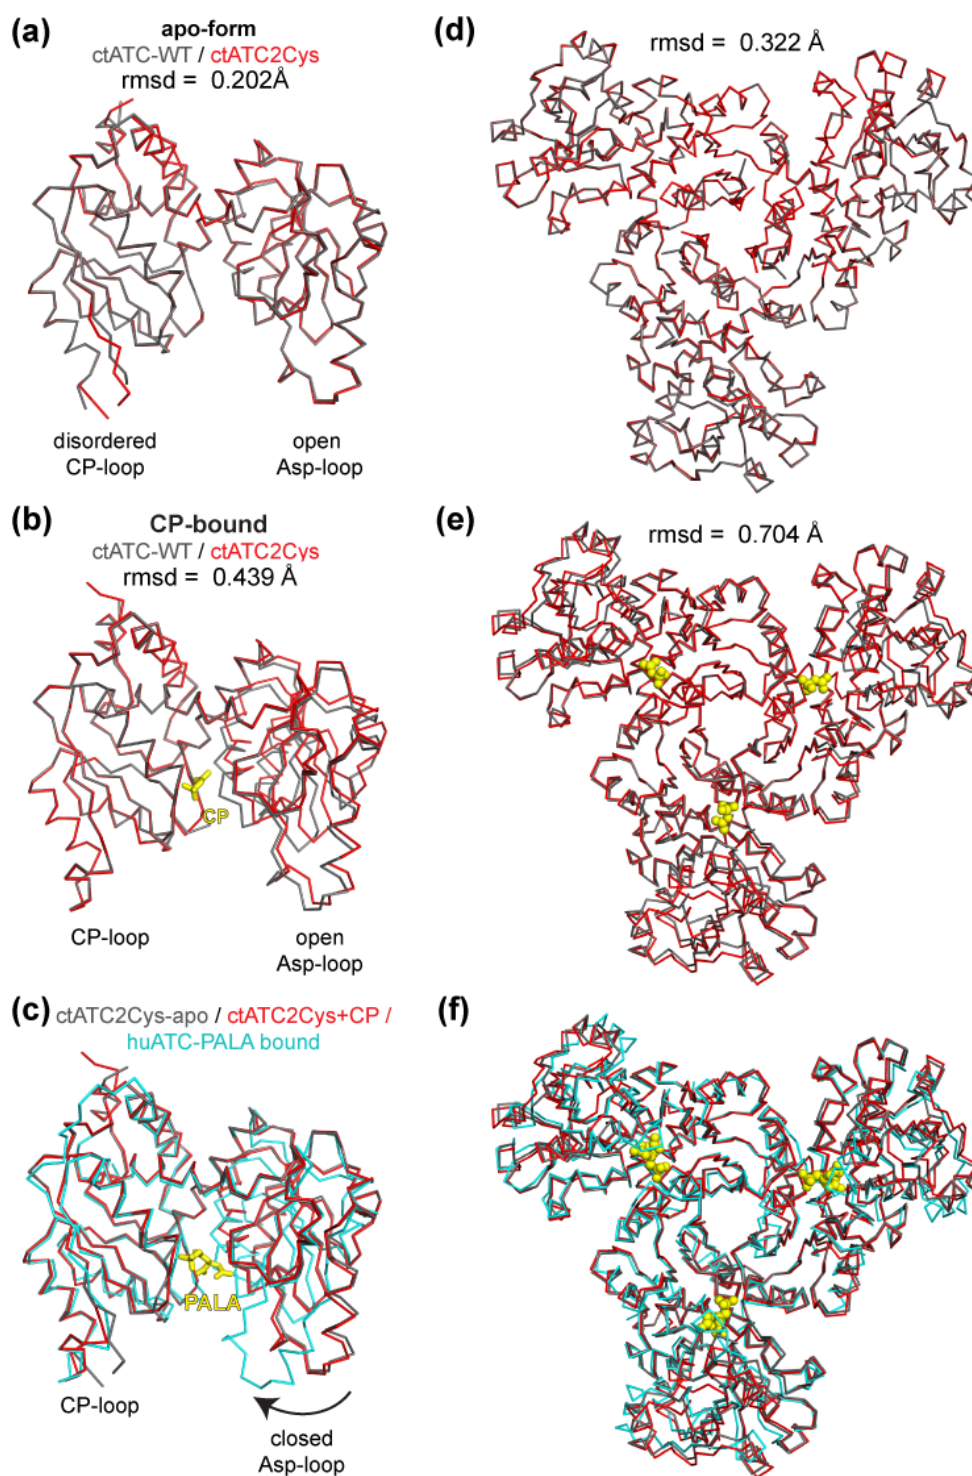

**Figure S2.** Structural similarity of ctATC2Cys and ctATC-WT. Ribbon superposition ctATC-WT (in grey) and ctATC2Cys (in red) subunits in apo form **(a)** or bound to CP **(b)**. **(c)** Superposition of ctATC2Cys apo and CP-bound structures with human ATC bound to PALA (shown in yellow sticks). The arrow indicates the expected movement of the Asp-loop in ctATC2Cys upon binding to PALA. **(d–f)** Superpositions for the entire protein trimer.

**Table S1. Oligonucleotides used for PCR amplification and mutagenesis of ctATC.** Codons for Cys mutations are in red and flanking regions for In-fusion cloning are underscored. 14 15

| Oligonucleotide | Sequence 5'-3'                                     |
|-----------------|----------------------------------------------------|
| ctATC-N2045C_Fw | CTG CGA ACC CTG GCC <b>TGC</b> TAC TCT GAT GCT ATC |
| ctATC-N2045C_Rv | GAT AGC ATC AGA GTA <b>GCA</b> GGC CAG GGT TCG CAG |
| ctATC-R2238C_Fw | TAT TTT CGG CAG ATG <b>TGC</b> TAT GGG CTG TAT TGT |
| ctATC-R2238C_Rv | ACA ATA CAG CCC ATA <b>GCA</b> CAT CTG CCG AAA ATA |
| ctATC-Fw        | <u>AAGTTCTGTTTCAGGGCCCTCATTCAAGAAATCTCAC</u>       |
| ctATC-Rv        | <u>ATGGTCTAGAAAGCTTTAGGACATGACCAGTGC</u>           |
